# Supplementary material for: A Crowdsourced Megastudy of 12 Digital Single-Session Interventions for Depression in American Adults
Source: Research Square preprint supplement (doi:10.21203/rs.3.rs-7236847/v1), 2025-08-25
Supplement: Supplementary file 1 [file SSI characteristics all three ratings.xlsx]

## Sheet: final ratings
SSI	Video or audio mostly (1/0, time mostly spent on video or audio)	Engagingness (1-5, how appealing an SSI is / how much one wants to go through it)	Interactive activities (1-5, how much users interact with an SSI beyond just reading or watching; for example completing writing exercises, meditations, or other activities).	Effortful (1-5, how much cognitive effort an SSI takes to complete)	Personalization / choice (1-5, allows for a personalized intervention experience)	Referenced depression (1/0, SSI directly refers to depression)	Refer to other resources (1/0, provides a link to other resources)	Meditation practice (1/0, includes a meditation or breathing practice)	Cognitive reframing (1-5, encourages users to challenge negative thought patterns and identify more positive ways of thinking through problems)	Behavioral activation (1-5, promotes engaging in positive activities)	Mindfulness (1-5, targets awareness and clarity of thought)	Clinician-created mostly (1/0, the project’s leaders are mental health clinicians or clinically-trained researchers)	take-home reminder (1/0, prints some kind of summary of what one did in the SSI)
Mindful Acceptance	1	3	4	3	1	0	0	1	4	2	5	1	0
Moral Elevation (Advertisement)	1	4	4	3	1	1	0	0	1	5	2	0	1
Mindful Attention Skills	1	3	2	2	1	1	0	0	4	2	5	0	1
5 Habits to Beat Depression	1	5	1	1	1	1	1	0	2	5	1	1	0
Interactive Cognitive Reappraisal	0	4	4	3	4	1	0	0	5	2	1	0	0
Expressive Writing (AI-supported)	0	3	4	4	5	0	0	0	4	1	1	0	0
Inner Child Healing Walk	1	4	3	1	1	0	0	1	1	1	4	0	0
Savoring Strategies	0	3	4	3	4	1	1	1	1	2	3	0	1
Personalized Intervention Recommender (aka Therabee)	0	3	2	2	5	1	1	0	1	1	1	1	1
Dialectical Behavioral Therapy Skills	1	3	1	2	4	1	1	1	3	2	4	1	0
Reframing Negative Thoughts	1	2	2	2	1	1	0	0	5	1	3	1	0
Behavioral Activation (aka Action Brings Change Project 10 minute version)	0	2	3	3	3	0	0	0	2	5	1	1	1

## Sheet: ratings together
SSI	rater	Video mostly (1/0, time mostly spent on videos)	Engagingness (1-5, how appealing an SSI is / how much one wants to go through it)	Interactive activities (1-5, how much users interact with an SSI beyond just reading or watching; for example completing writing exercises, meditations, or other activities).	Effortful (1-5, how much cognitive effort an SSI takes to complete)	Personalization / choice (1-5, allows for a personalized intervention experience)	Referenced depression (1/0, SSI directly refers to depression)	Refer to other resources (1/0, provides a link to other resources)	Meditation practice (1/0, includes a meditation or breathing practice)	Cognitive reframing (1-5, encourages users to challenge negative thought patterns and identify more positive ways of thinking through problems)	Behavioral activation (1-5, promotes engaging in positive activities)	Mindfulness (1-5, targets awareness and clarity of thought)	Feedback
1. Mindful Acceptance - A clinical psychologist explains a few ways to use mindful acceptance to deal with difficult thoughts and feelings.Â	benji	1	3	4	2	1	0	0	1	4	1	5	NA
1. Mindful Acceptance - A clinical psychologist explains a few ways to use mindful acceptance to deal with difficult thoughts and feelings.Â	amanda	1	3	4	3	1	0	0	1	5	1	5	NA
1. Mindful Acceptance - A clinical psychologist explains a few ways to use mindful acceptance to deal with difficult thoughts and feelings.Â	erin	1	3	3	3	4	0	0	1	2	2	5	add subtitles; show text boxes on same page as first video (similar to the way second and third videos are formatted); email participants a copy of their responses; get rid of Qualtrics automative end page
2. ElevateD - Users learn about moral elevation, then watch a touching video where a man does good deeds for people in his community. Finally,, they plan a positive action they can take for others in their own life.	benji	1	4	3	2	1	1	0	0	1	5	2	NA
2. ElevateD - Users learn about moral elevation, then watch a touching video where a man does good deeds for people in his community. Finally,, they plan a positive action they can take for others in their own life.	amanda	0	5	4	3	1	1	0	0	1	5	1	NA
2. ElevateD - Users learn about moral elevation, then watch a touching video where a man does good deeds for people in his community. Finally,, they plan a positive action they can take for others in their own life.	erin	1	4	1	4	4	0	0	0	1	5	2	first page wording review; instead of saying 'do not advance to next page' program a page limit into Qualtrics; don't know how I feel about phrasing 'virtue' as often related to religion which is not intention of intervcention; 'motivated to live in a more noble or virtuous way' instead of 'a nobler or virtuous way'; customize end page instead of Qualtrics automative message
3. Finding Focus - A series of videos teach mindfulness skills: how to release thoughts and re-evaluate.Â	benji	1	4	2	2	1	1	0	0	4	2	5	NA
3. Finding Focus - A series of videos teach mindfulness skills: how to release thoughts and re-evaluate.Â	amanda	1	3	5	2	1	1	0	0	4	1	5	NA
3. Finding Focus - A series of videos teach mindfulness skills: how to release thoughts and re-evaluate.Â	erin	1	3	1	2	2	1	0	0	5	3	4	just suggest the timer, no need for instructions as many may not use iPhone/already know how to do this, get rid of alarm images; get rid of Qualtrics automative message page or personalize message
4. 5 ONE-MINUTE Habits to Beat DEPRESSION - A clinical psychologist and science communicator describes his top 5 one-minute habits to beat depression.	benji	1	5	1	1	1	1	0	0	4	4	1	NA
4. 5 ONE-MINUTE Habits to Beat DEPRESSION - A clinical psychologist and science communicator describes his top 5 one-minute habits to beat depression.	amanda	1	4	2	2	1	1	0	0	2	5	1	NA
4. 5 ONE-MINUTE Habits to Beat DEPRESSION - A clinical psychologist and science communicator describes his top 5 one-minute habits to beat depression.	erin	1	5	0	1	1	1	1	0	1	5	1	subtitles (unless can choose via youtube for final intervention)
5. Interactive Cognitive reappraisal - An interactive SSI where participants learn how to reframe negative thoughtsÂ	benji	0	4	5	3	4	1	0	0	5	2	1	NA
5. Interactive Cognitive reappraisal - An interactive SSI where participants learn how to reframe negative thoughtsÂ	amanda	0	5	5	3	3	1	0	0	5	2	2	NA
5. Interactive Cognitive reappraisal - An interactive SSI where participants learn how to reframe negative thoughtsÂ	erin	0	1	3	2	5	0	0	0	5	1	1	don't need so many breaks in text (i.e., pages); start of quotation mark can be removed; formatting; some are programmed as forced choice and some are not (make this consistent); some pages move forward after selection but still have 'ok' button (also make this consistent)
6. Personalized LLM-Enhanced Stories to Manage Common Negative Thoughts - Participants describe a negative thought they struggle with and an LLM helps them to consider a story in which they might overcome it.	benji	0	2	5	5	5	1	0	0	2	1	1	NA
6. Personalized LLM-Enhanced Stories to Manage Common Negative Thoughts - Participants describe a negative thought they struggle with and an LLM helps them to consider a story in which they might overcome it.	amanda	0	4	4	4	5	0	0	0	5	1	2	NA
6. Personalized LLM-Enhanced Stories to Manage Common Negative Thoughts - Participants describe a negative thought they struggle with and an LLM helps them to consider a story in which they might overcome it.	erin	0	1	1	4	4	0	0	0	5	1	0	make fun fact relative to storytelling as an intervention for depression (or something along these lines) so it is relevant
7. Inner Child healing Walk - An animated video with a first-person view of walking through a peaceful environment with friendly animals and listen to guided meditations. Note: The Celeste team is still working on the final version of this intervention.	benji	1	4	3	3	1	0	0	1	1	1	4	NA
7. Inner Child healing Walk - An animated video with a first-person view of walking through a peaceful environment with friendly animals and listen to guided meditations. Note: The Celeste team is still working on the final version of this intervention.	amanda	1	5	3	1	1	0	0	1	1	1	5	NA
7. Inner Child healing Walk - An animated video with a first-person view of walking through a peaceful environment with friendly animals and listen to guided meditations. Note: The Celeste team is still working on the final version of this intervention.	erin	1	1	1	1	1	0	0	1	1	1	2	at time poor video quality; exercises may not apply to everyone (i.e., as 6 year old child); assumptions about experience
8. Savoring Strategies to Reduce Depression - An SSI introducing savoring strategies to improve mood.	benji	0	3	4	4	5	1	1	1	2	2	3	NA
8. Savoring Strategies to Reduce Depression - An SSI introducing savoring strategies to improve mood.	amanda	0	5	5	3	3	1	1	0	1	5	4	NA
8. Savoring Strategies to Reduce Depression - An SSI introducing savoring strategies to improve mood.	erin	0	2	2	1	5	1	1	1	1	2	1	formatting of list of three strategies; give example of 'type of person' instead of just saying personality type/character traits
9. Therabee - Identifies the kinds of depression one struggles most with and offers a personalized recommendation for future depression support options	benji	0	3	5	4	5	1	1	0	1	1	1	NA
9. Therabee - Identifies the kinds of depression one struggles most with and offers a personalized recommendation for future depression support options	amanda	0	2	2	2	5	1	1	0	1	1	1	NA
9. Therabee - Identifies the kinds of depression one struggles most with and offers a personalized recommendation for future depression support options	erin	0	3	1	2	5	1	1	0	1	1	1	can move on without answeringâ€¦ is this the intention?
10. SuperSkills DBT - presents videos from dialectical behavioral therapy on various ways to control negative emotions.	benji	1	3	1	2	4	1	1	1	3	2	4	NA
10. SuperSkills DBT - presents videos from dialectical behavioral therapy on various ways to control negative emotions.	amanda	1	4	2	1	3	1	1	0	3	3	3	NA
10. SuperSkills DBT - presents videos from dialectical behavioral therapy on various ways to control negative emotions.	erin	1	1	1	3	1	1	1	1	2	2	4	formatting; subtitles; length limit so you cannot advance without watching video
11. Reframing Negative Thoughts	benji	1	3	2	2	1	1	0	0	5	1	3
11. Reframing Negative Thoughts	amanda	1	2	3	2	1	1	0	0	5	1	2
11. Reframing Negative Thoughts	erin	1	1	1	3	1	0	0	0	5	1	3
12. (active comparison SSI) Action Brings Change Project 10 minute version â€“ A behavioral activation SSI where users create an â€œaction planâ€ of helpful activities to engage in.	benji	0	4	4	3	1	0	0	0	3	5	1	NA
12. (active comparison SSI) Action Brings Change Project 10 minute version â€“ A behavioral activation SSI where users create an â€œaction planâ€ of helpful activities to engage in.	amanda	0	2	3	3	3	0	1	1	3	5	2	NA
12. (active comparison SSI) Action Brings Change Project 10 minute version â€“ A behavioral activation SSI where users create an â€œaction planâ€ of helpful activities to engage in.	erin	1	1	3	4	1	0	0	0	1	4	1	found video to be a bit long as it was watching the same thing (mention that they can move forward when they'd like)
